# Supplementary material
Source: Springer Nature journal article supplement (https://www.springermedizin.de/resource/supplementary/12894_2012_252_MOESM2_ESM.pdf/9513294)

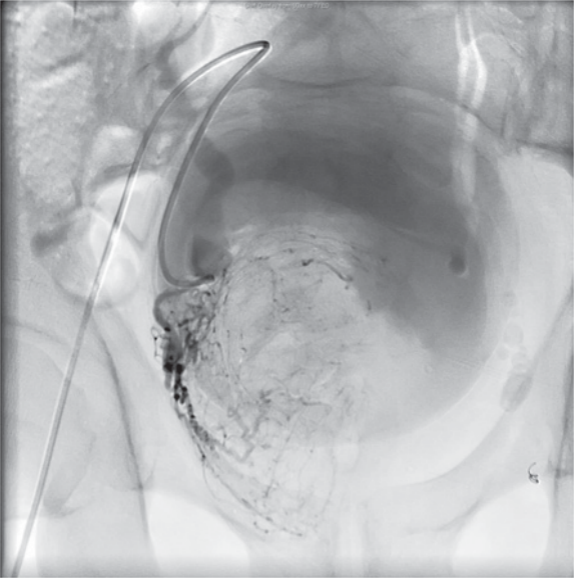

Supplement: MOESM2 [file 9513294]
